# Supplementary material
Source: MDPI journal article supplement (https://www.mdpi.com/2624-8549/5/1/41)
Supplement: s1 [file s1]

## SUPPLEMENTARY MATERIAL

Ni-Mg/Al mixed oxides prepared from double layered hydroxides as catalysts for the conversion of furfural to tetrahydro-furfuryl alcohol.

**Abdulaziz Aldureid<sup>1</sup>, Daniel Montané<sup>1</sup>, Jordi Llorca<sup>2</sup> and Francesc Medina<sup>1,\*</sup>**

<sup>1</sup> Departament d'Enginyeria Química. Universitat Rovira i Virgili. Av. Països Catalans 26. E-43007, Tarragona, Spain.

<sup>2</sup> Institute of Energy Technologies, Department of Chemical Engineering and Barcelona Research Center in Multiscale Science and Engineering. Universitat Politècnica de Catalunya, EEBE. Eduard Maristany 16. E-08019, Barcelona, Spain.

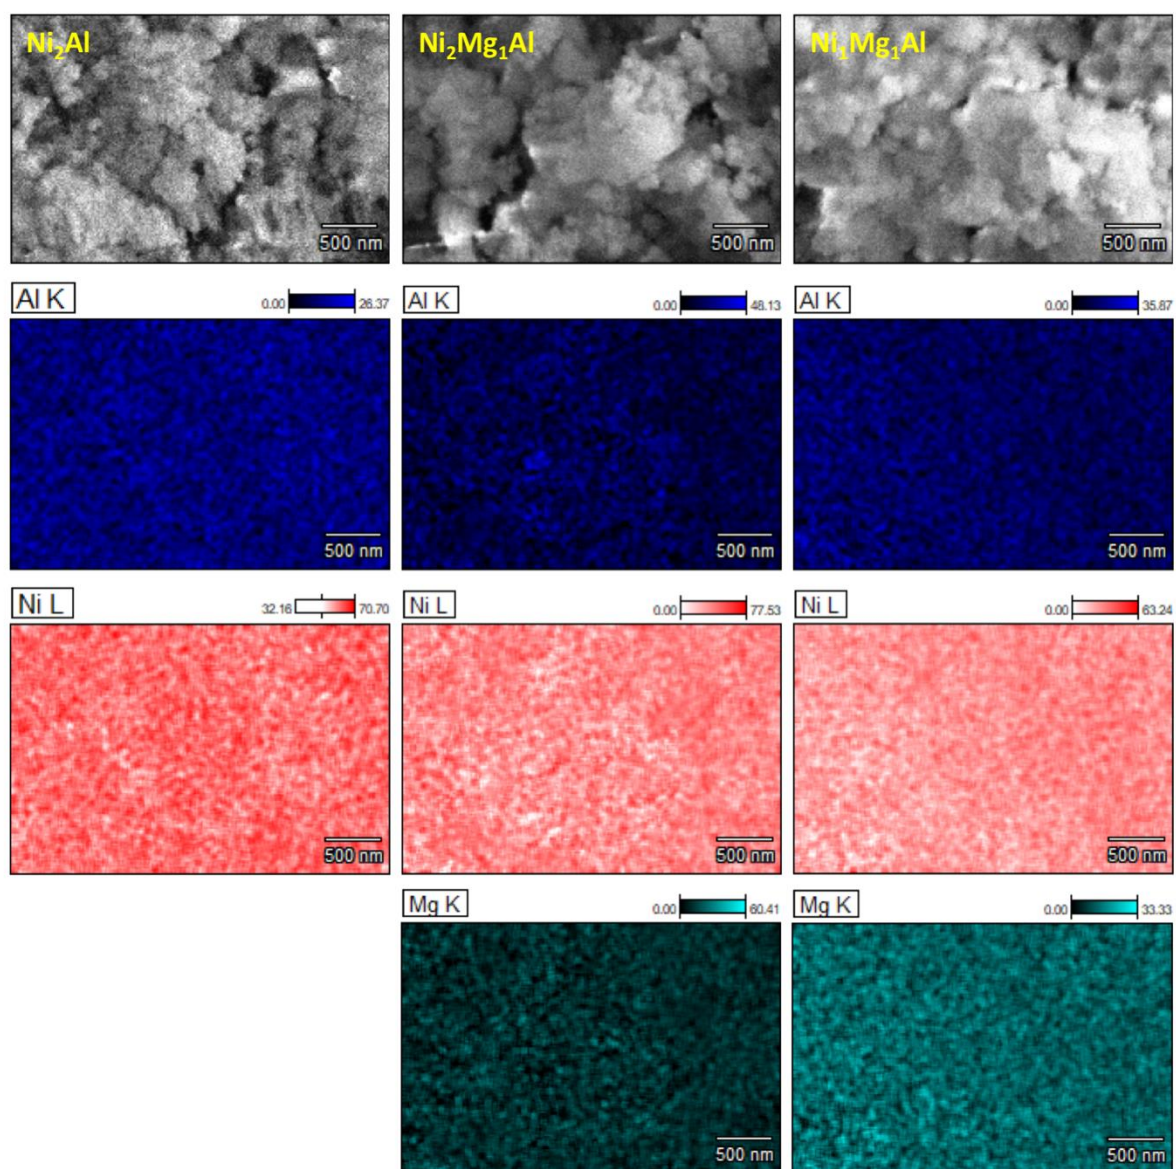

**Figure S1.** FESEM-EDX imaging of the LDH precursors calcined at 400 °C for 4 h.

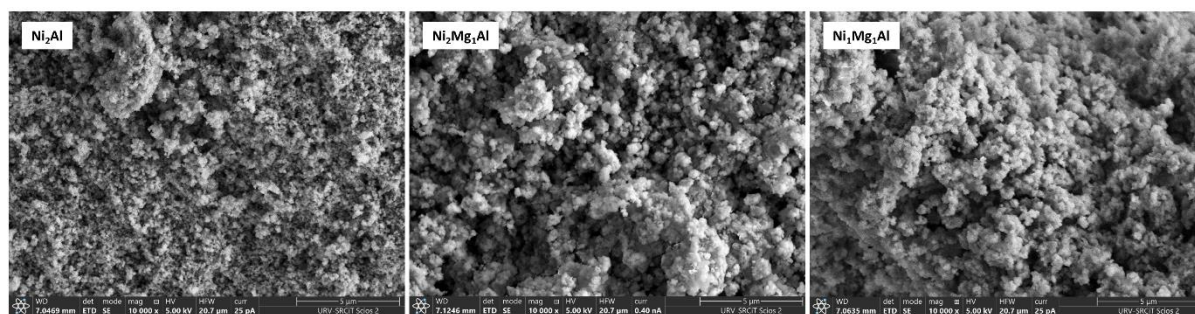

**Figure S2.** SEM imaging of the LDH precursors calcined at 400 °C for 4 h (10000 × magnification)
